# Supplementary material for: Personalized Target Heart Rate for Patients with Heart Failure and Reduced Ejection Fraction
Source: MDPI journal article supplement (doi:10.3390/jpm12010050), 2022-01-05
Supplement: s1 [file s1]

A. Overall

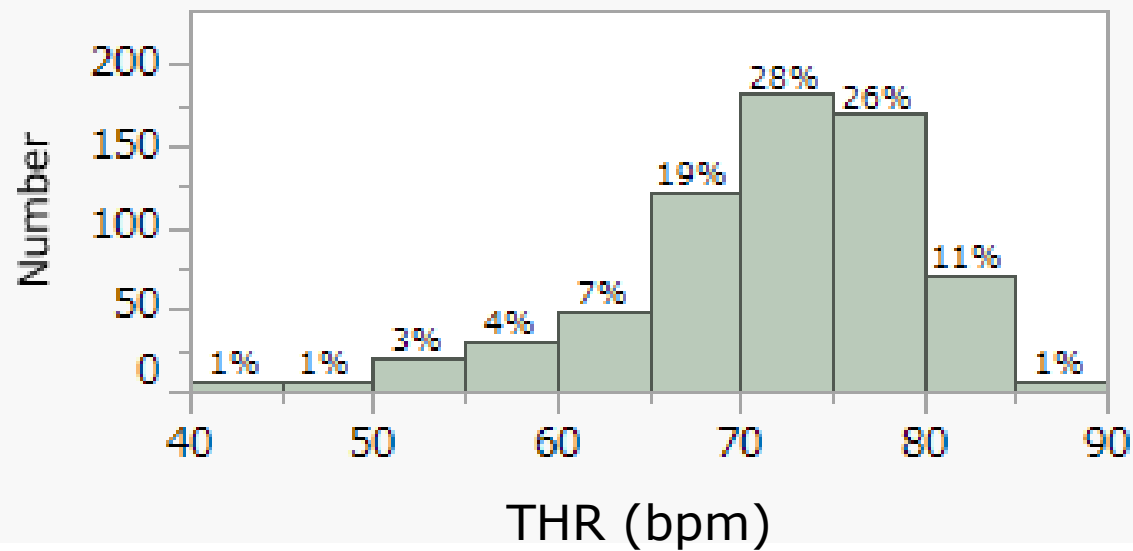

B. L group

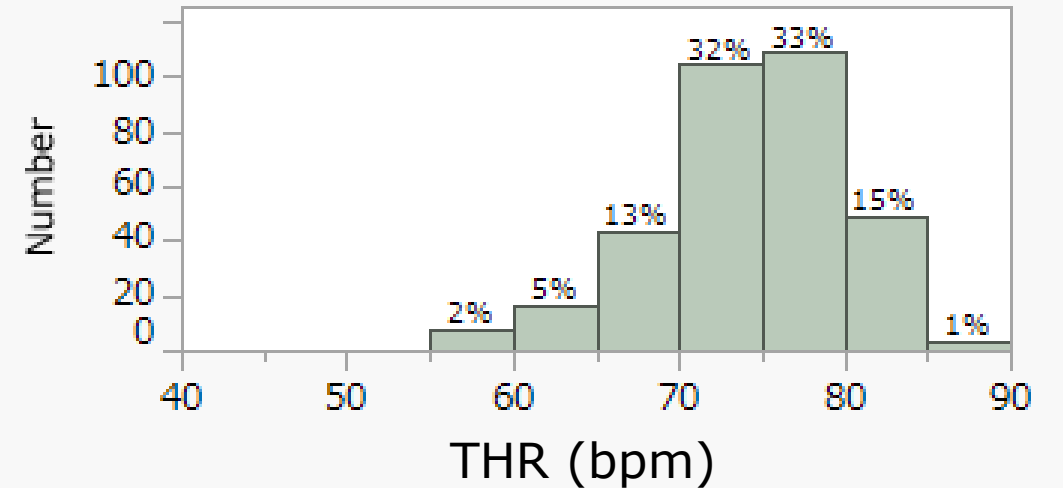

C. H group

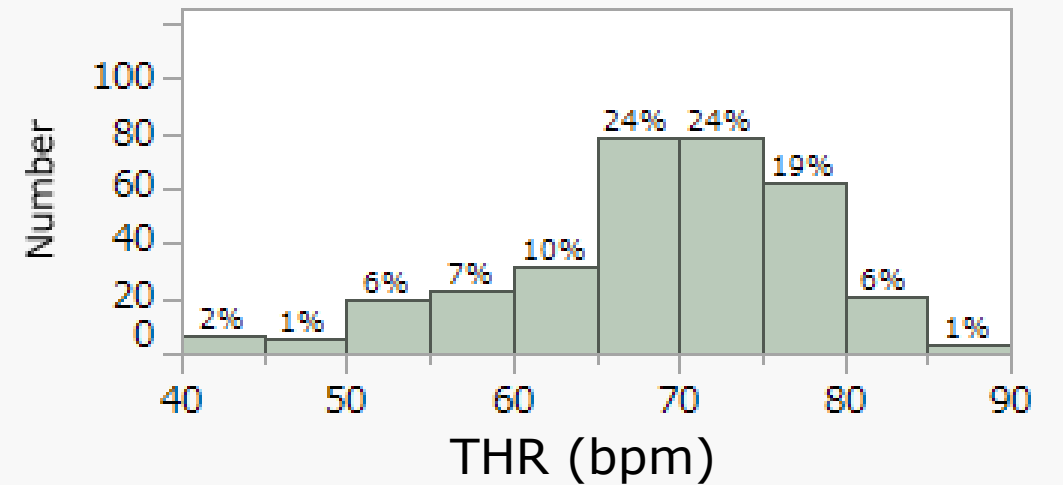

Supple. Figure S1 Distribution of THR in the L group and the H group

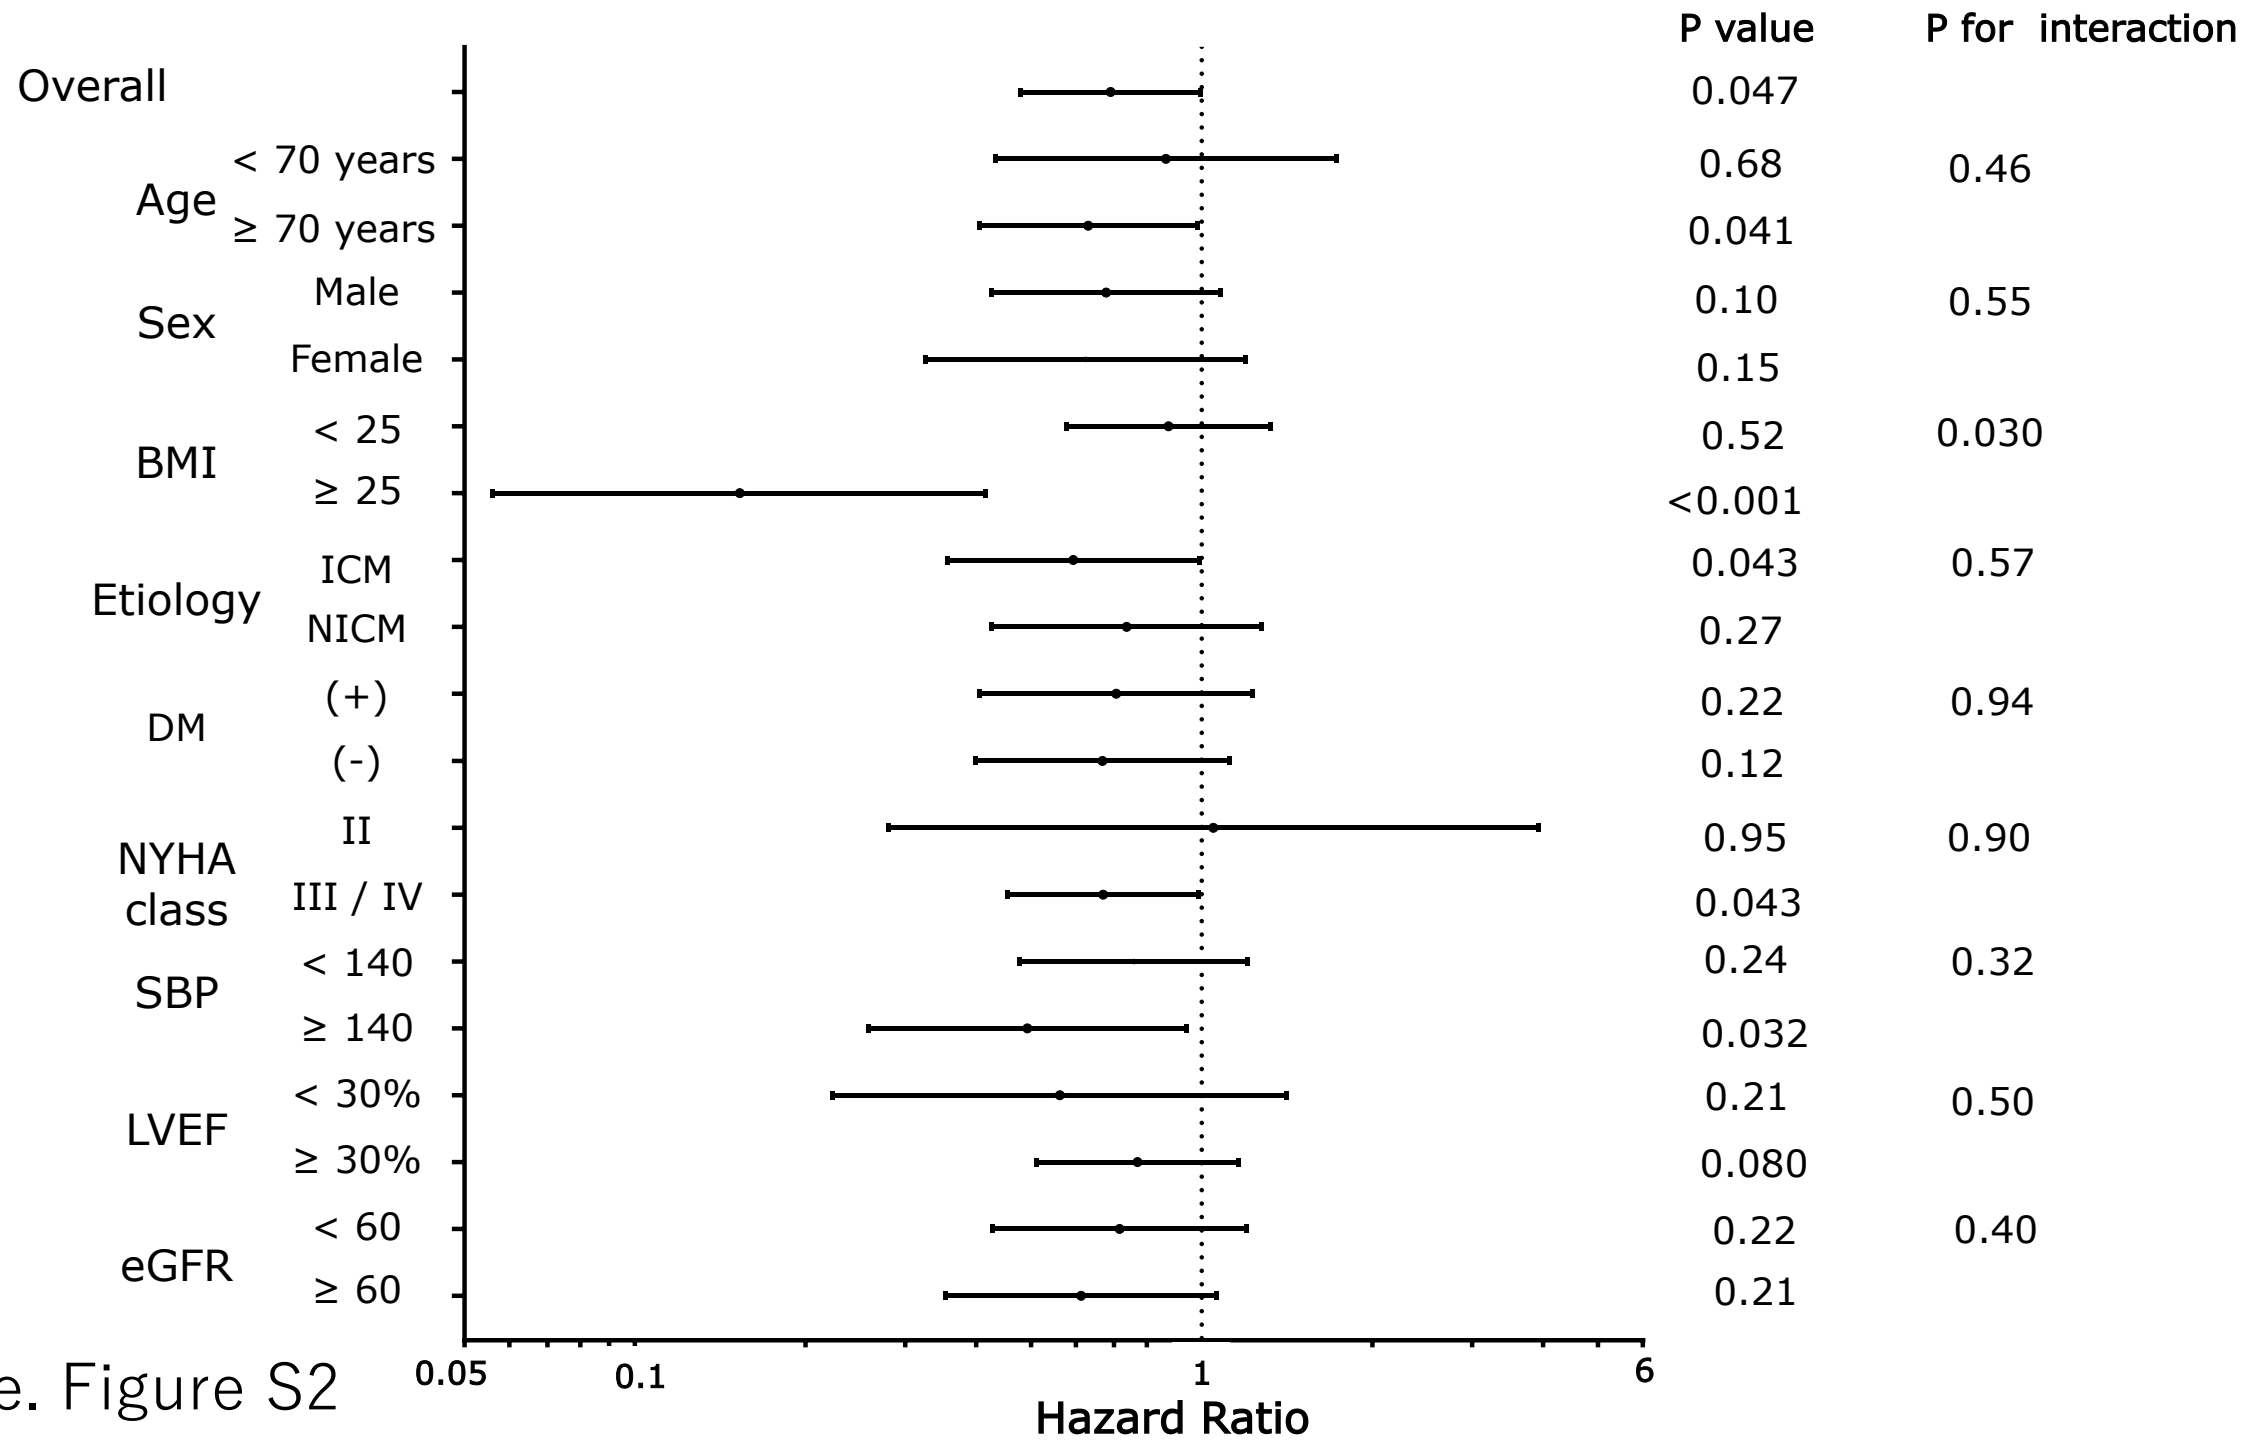

Supple. Figure S2
